# Supplementary material for: Development of high refractive index UiO-66 framework derivatives via ligand halogenation
Source: Royal Society of Chemistry journal article supplement (doi:10.1039/d3cp01291c), 2023-01-01
Supplement: d3cp01291c1.pdf [file d3cp01291c1.pdf]

## Supporting Information

# Development of high refractive index UiO-66 framework derivatives via ligand halogenation

Marvin Treger<sup>1,2</sup>, Adrian Hannebauer<sup>1</sup>, Peter Behrens<sup>1,2</sup> and Andreas M. Schneider<sup>1,2</sup>

<sup>1</sup>*Institute of Inorganic Chemistry, Leibniz University Hannover, Callinstr. 9, 30167 Hannover, Germany*

<sup>2</sup>*Cluster of Excellence PhoenixD (Photonics, Optics, and Engineering – Innovation Across Disciplines), Hannover, Germany*

### Table of Contents

|                                                  |    |
|--------------------------------------------------|----|
| Section 1 Experimental Details .....             | 3  |
| Chemicals .....                                  | 3  |
| Synthesis of MOFs .....                          | 3  |
| Characterization of UiO-66-I <sub>2</sub> .....  | 5  |
| NMR Spectra .....                                | 6  |
| UV-Vis Spectra .....                             | 7  |
| Section 2 Plane wave basis set convergence ..... | 8  |
| UiO-66 .....                                     | 8  |
| UiO-66-F .....                                   | 9  |
| UiO-66-Cl .....                                  | 9  |
| UiO-66-Br .....                                  | 10 |
| UiO-66-I .....                                   | 10 |
| UiO-66-I <sub>2</sub> .....                      | 11 |
| Section 3 XC functional benchmark .....          | 12 |
| UiO-66 .....                                     | 12 |
| UiO-66-F .....                                   | 12 |
| UiO-66-Cl .....                                  | 13 |
| UiO-66-Br .....                                  | 13 |
| UiO-66-I .....                                   | 14 |
| UiO-66-I <sub>2</sub> .....                      | 14 |
| Section 4 Details of the DFT models .....        | 15 |
| Section 5 Band structures .....                  | 16 |
| UiO-66 .....                                     | 16 |
| UiO-66-F .....                                   | 17 |
| UiO-66-Cl .....                                  | 17 |

|                                 |    |
|---------------------------------|----|
| UiO-66-Br .....                 | 18 |
| UiO-66-I .....                  | 18 |
| UiO-66-I <sub>2</sub> .....     | 19 |
| Section 6 Refractive Index..... | 20 |
| References.....                 | 20 |

## Section 1 Experimental Details

### Chemicals

Zirconium (IV) chloride (>99.5%,  $ZrCl_4$ , Sigma Aldrich), *N,N*-dimethylformamide (99.8%, DMF, Sigma Aldrich), formic acid (>98%,  $HCOOH$ , Merck), terephthalic acid (99%,  $C_8H_6O_4$  ( $H_2BDC$ ), Honeywell), 2-fluoroterephthalic acid (98%,  $C_8H_5FO_4$  ( $H_2BDC-F$ ), ABCR), 2-chloroterephthalic acid (98%,  $C_8H_5ClO_4$  ( $H_2BDC-Cl$ ), BLDpharm), 2-bromoterephthalic acid (97%,  $C_8H_5BrO_4$  ( $H_2BDC-Br$ ), ABCR), 2-iodoterephthalic acid (95%,  $C_8H_5IO_4$  ( $H_2BDC-I$ ), ABCR), 2,5-iodoterephthalic acid (98%,  $C_8H_5I_2O_4$  ( $H_2BDC-I_2$ ), AmBeed), Acetone (99.5 %,  $C_4H_6O$  Sigma Aldrich), Calcium chloride dehydrate ( $\geq 99\%$  ,  $CaCl_2 \cdot 2 H_2O$ , Sigma Aldrich), deuterated dimethyl sulfoxide for NMR analysis ( $\geq 99.8\%$  D,  $C_2H_6OS$ , Eurisotop), deuterated water for NMR analysis (99,98 % D,  $D_2O$ , Sigma Aldrich), Hydrofluoric acid (40 % in water, HF, Fisherscientific) were used without further purification.

### Synthesis of MOFs

#### UiO-66

Nearly defect-free UiO-66 was synthesized according to Shearer *et al.*, by sequentially adding 0.777 g  $ZrCl_4$  (1 eq), 0.552 mL 37% HCl (2 eq) and 1.104 g  $H_2BDC$  (2 eq) to 20 mL DMF (77.5 eq) to a beaker.<sup>[1]</sup> After stirring this solution for 30 minutes a clear solution was obtained and transferred to a Teflon liner and sealed in a stainless-steel autoclave, which was heated at 220 °C for 20 h. The resulting white powder was separated via centrifugation, washed with DMF and acetone and dried under vacuum overnight. Afterwards the powder was purified using a Soxhlet-extraction with acetone for 24 h and activated at 150 °C for 20 h.

#### UiO-66-F

UiO-66-F was synthesized in a 100 mL Pyrex glass vessel by sequentially adding 0.1505 g  $ZrCl_4$  (1 eq), 0.609 mL formic acid (25 eq) and 0.1189 g  $H_2BDC-F$  (1 eq) in 25 mL DMF (500 eq). The glass vessel was sealed and heated at 120 °C for 24 h. The resulting powder was separated via centrifugation, washed with DMF and acetone and dried under vacuum overnight. Afterwards the powder was purified using a Soxhlet-extraction with acetone for 24 h and activated at 120 °C for 20 h.

#### UiO-66-Cl

UiO-66-Cl was synthesized in a 100 mL Pyrex glass vessel by sequentially adding 0.1505 g  $ZrCl_4$  (1 eq), 0.609 mL formic acid (25 eq) and 0.1295 g  $H_2BDC-Cl$  (1 eq) in 25 mL DMF (500 eq). The glass vessel was sealed and heated at 120 °C for 24 h. The resulting powder was separated via centrifugation, washed with DMF and acetone and dried under vacuum overnight. Afterwards the powder was purified using a Soxhlet-extraction with acetone for 24 h and activated at 120 °C for 20 h.

#### UiO-66-Br

UiO-66-Br was synthesized in a 100 mL Pyrex glass vessel by sequentially adding 0.1505 g  $ZrCl_4$  (1 eq), 1.218 mL formic acid (50 eq) and 0.1582 g  $H_2BDC-Br$  (1 eq) in 25 mL DMF (500 eq). The glass vessel was sealed and heated at 120 °C for 24 h. The resulting powder was separated via centrifugation, washed with DMF and acetone and dried under vacuum overnight. Afterwards the powder was purified using a Soxhlet-extraction with acetone for 24 h and activated at 120 °C for 20 h.

#### UiO-66-I

UiO-66-I was synthesized in a 100 mL Pyrex glass vessel by sequentially adding 0.1505 g  $ZrCl_4$  (1 eq), 6.091 mL formic acid (250 eq) and 0.1886 g  $H_2BDC-I$  (1 eq) in 25 mL DMF (500 eq). The glass vessel was sealed and heated at 120 °C for 24 h. The resulting powder was separated via centrifugation, washed with DMF and acetone and dried under vacuum overnight. Afterwards the powder was purified using a Soxhlet-extraction with acetone for 24 h and activated at 120 °C for 20 h.

#### UiO-66-I<sub>2</sub>

UiO-66-I<sub>2</sub> was synthesized in a 100 mL Pyrex glass vessel by sequentially adding 0.1505 g  $ZrCl_4$  (1 eq), 2.436 mL formic acid (100 eq) and 0.2669 g  $H_2BDC-I_2$  (1 eq) in 25 mL DMF (500 eq). The glass vessel was sealed and heated at 120 °C for 24 h. The resulting powder was separated via centrifugation, washed with DMF and acetone and dried under vacuum overnight. Afterwards the powder was purified using a Soxhlet-extraction with acetone for 24 h and activated at 120 °C for 20 h.

### Characterization of UiO-66-I<sub>2</sub>

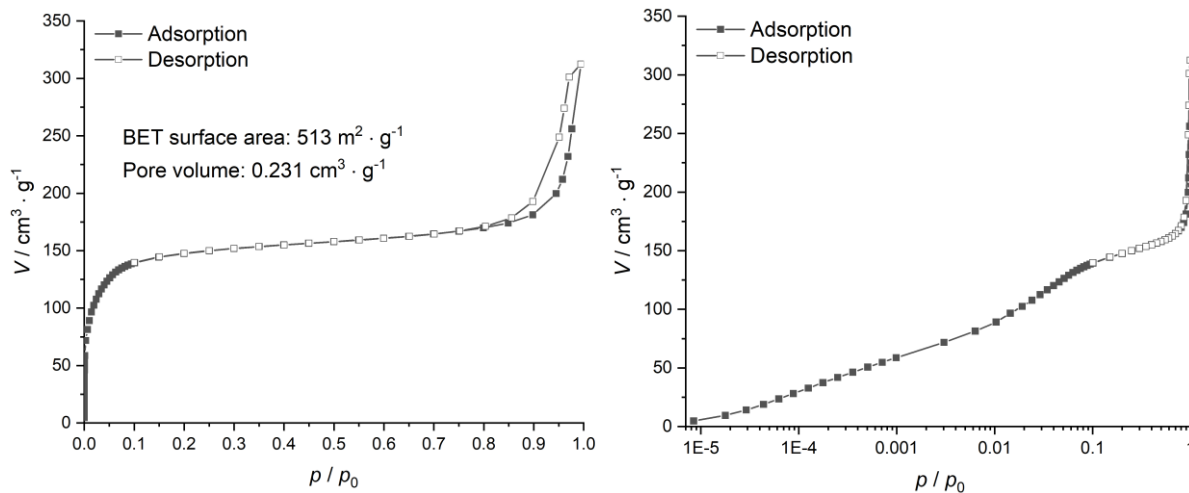

Figure S1. Ar sorption @ 87 K of UiO-66-I<sub>2</sub>. The pore volume was evaluated at  $p/p_0 = 0.9$ .

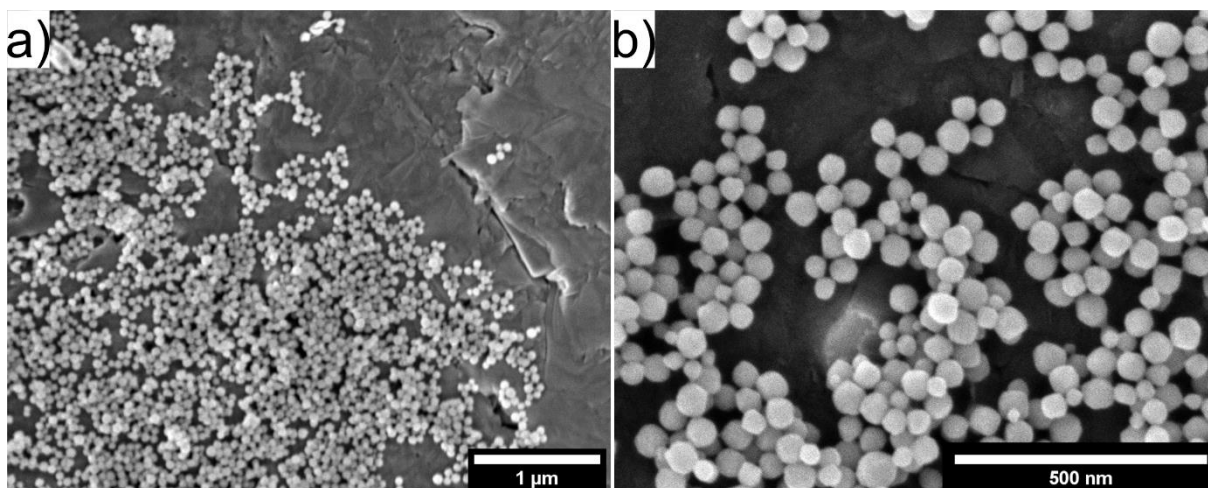

Figure S2. SEM images of UiO-66-I<sub>2</sub> with a magnification of a) 25000 and b) 100000 times.

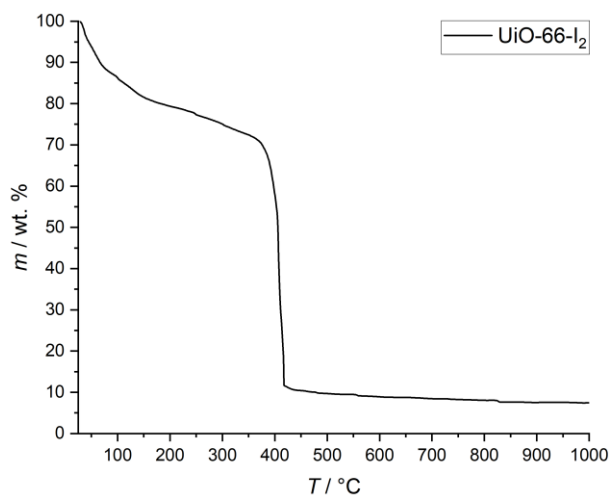

Figure S3. Thermogravimetric measurement of UiO-66-I<sub>2</sub>.

## NMR Spectra

The successful non-destructive incorporation of the linkers into the framework and the absence of guest molecules after washing and drying the powders were monitored with  $^1\text{H}$ -NMR-spectroscopy on digested samples.

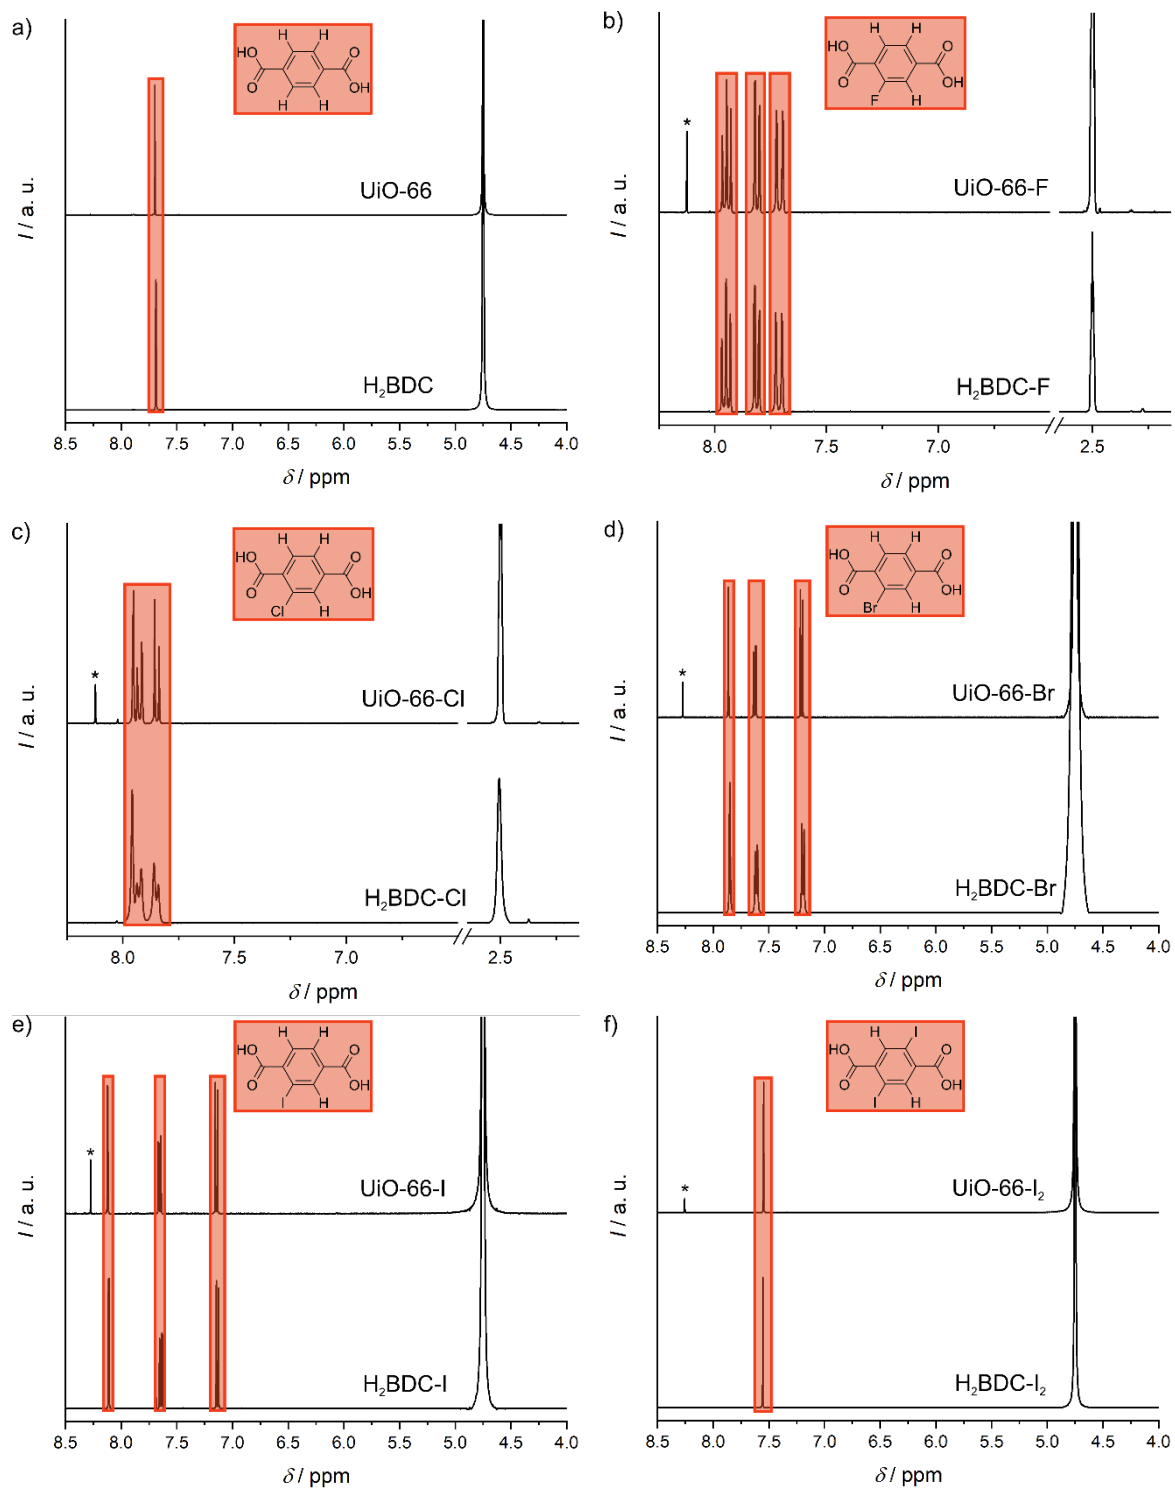

Figure S4.  $^1\text{H}$ -NMR-Spectra of digested MOFs compared to the linker. a) UiO-66, b) UiO-66-F, c) UiO-66-Cl, d) UiO-66-Br, e) UiO-66-I, f) UiO-66-I<sub>2</sub>. The \* indicates the presents of formic acid, which is incorporated into the framework. Peaks at 2.5 and 4.75 ppm represent the NMR-solvent DMSO-d<sub>6</sub> and D<sub>2</sub>O, respectively.

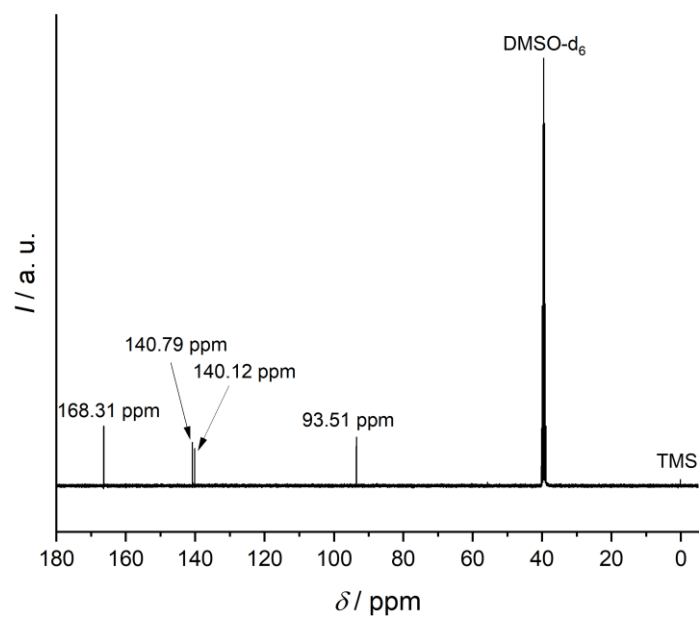

Figure S5.  $^{13}\text{C}$ -NMR-Spectrum of 2,5-diiodo-1,4-dibenzoic acid. The presence of four signals underlines the *para* position of the iodine atoms and is in accordance with the literature values (92.99 ppm, 140.02 ppm, 140.66 ppm and 165.94 ppm).<sup>[2]</sup>

### UV-Vis Spectra

To validate the electronic structure calculations, UV-Vis DRS was performed.

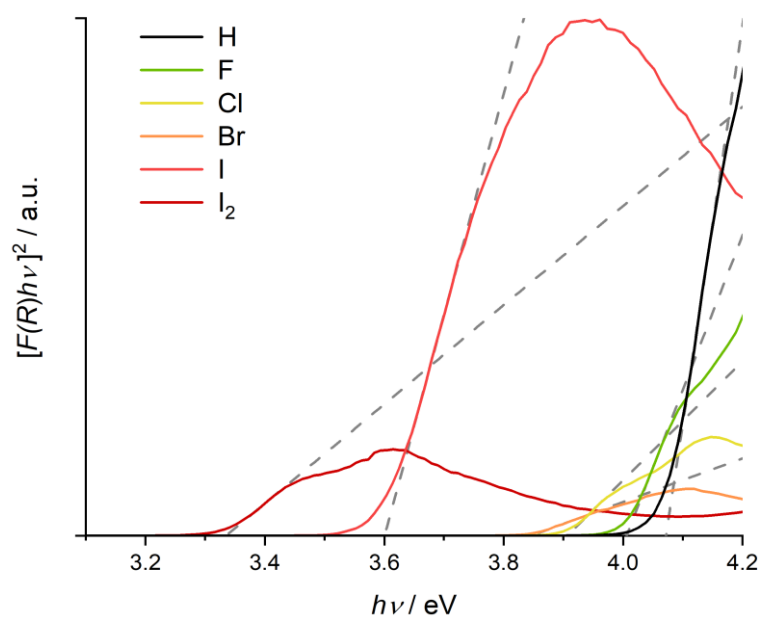

Figure S6. Tauc plot of recorded UV-Vis-Spectra.

## Section 2 Plane wave basis set convergence

The kinetic plane wave energy cutoff convergence was tested with respect to the lattice parameter  $a$  of the primitive cells and the threshold was set to a change of  $0.01 \text{ \AA}$ . The sampling of the Brillouin zone was tested with respect to the total energy and the lattice parameter  $a$  of the primitive cells. Analogous to the kinetic plane wave energy cutoff convergence, the threshold for the change of the lattice parameter was set to a change of  $0.01 \text{ \AA}$ .

UiO-66

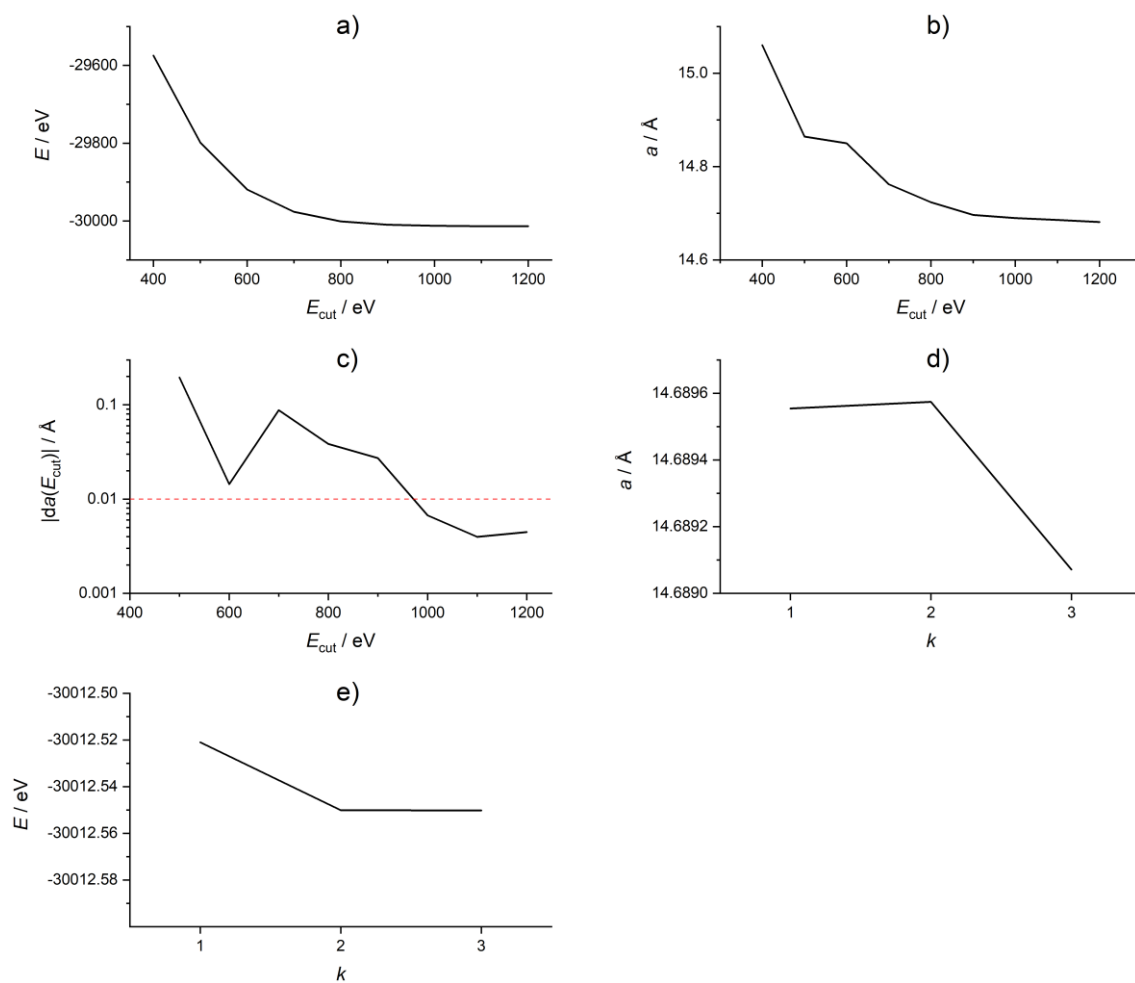

Figure S7. UiO-66: Convergence of a) total energy, b) lattice parameter  $a$ , c) lattice parameter  $a$  (derivation), d)  $k$  points (energy) and e)  $k$  points (lattice).



### UiO-66-F

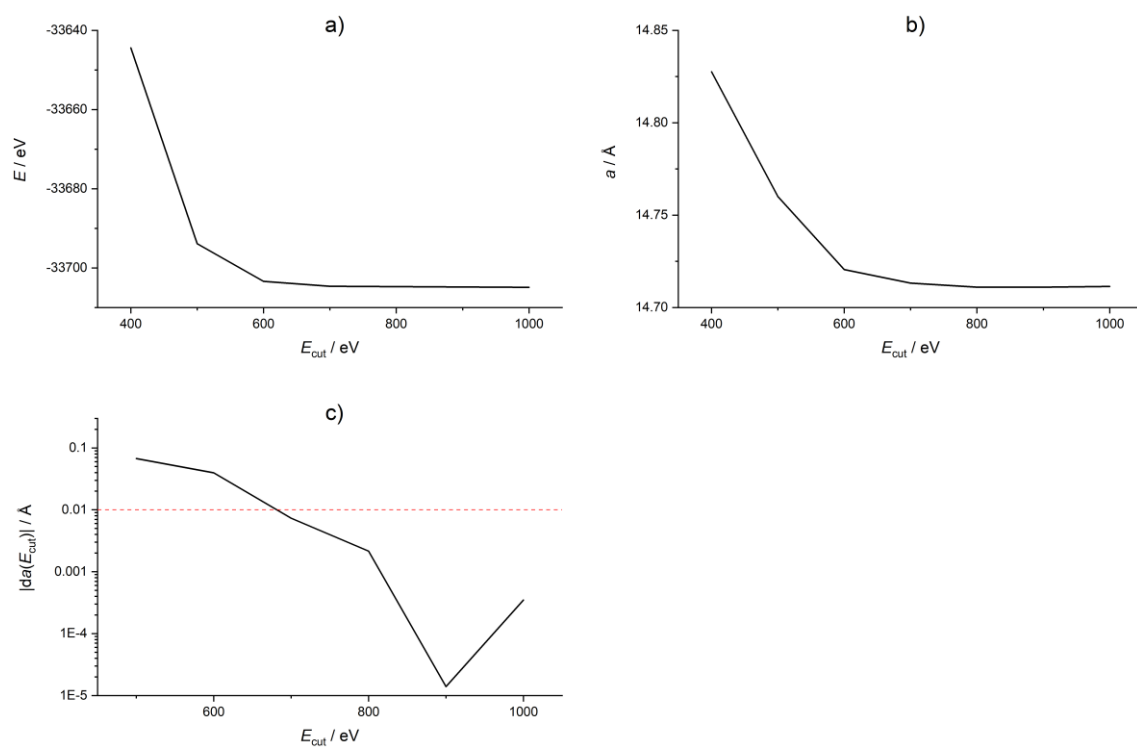

Figure S8. UiO-66-F: Convergence of a) total energy, b) lattice parameter  $a$  and c) lattice parameter  $a$  (derivation).

### UiO-66-Cl

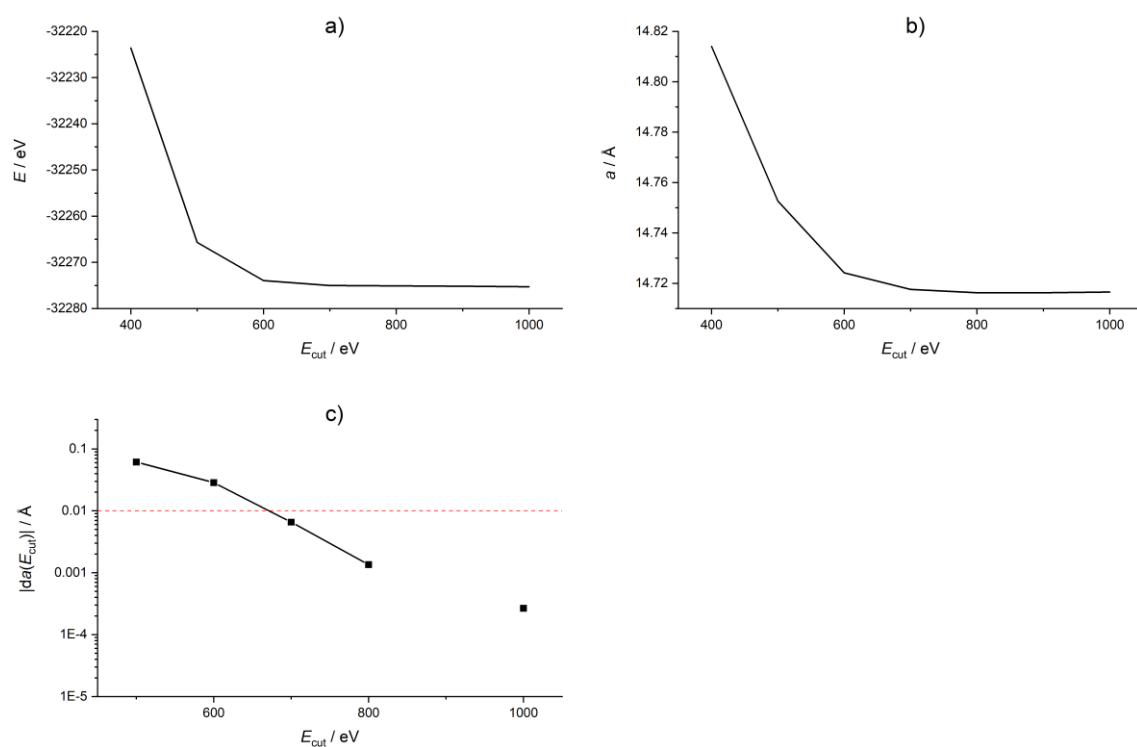

Figure S9. UiO-66-Cl: Convergence of a) total energy, b) lattice parameter  $a$  and c) lattice parameter  $a$  (derivation), derivation at 900 eV is 0 and not shown.

### UiO-66-Br

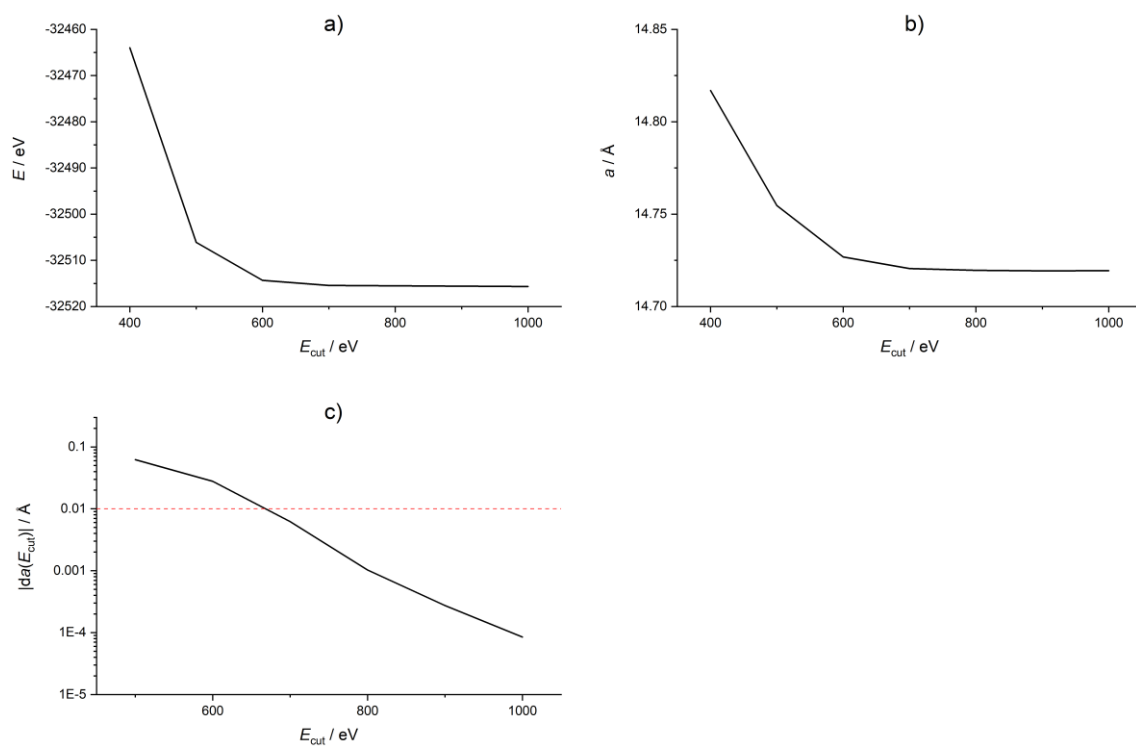

Figure S10. UiO-66-Br: Convergence of a) total energy, b) lattice parameter  $a$  and c) lattice parameter  $a$  (derivation).

### UiO-66-I

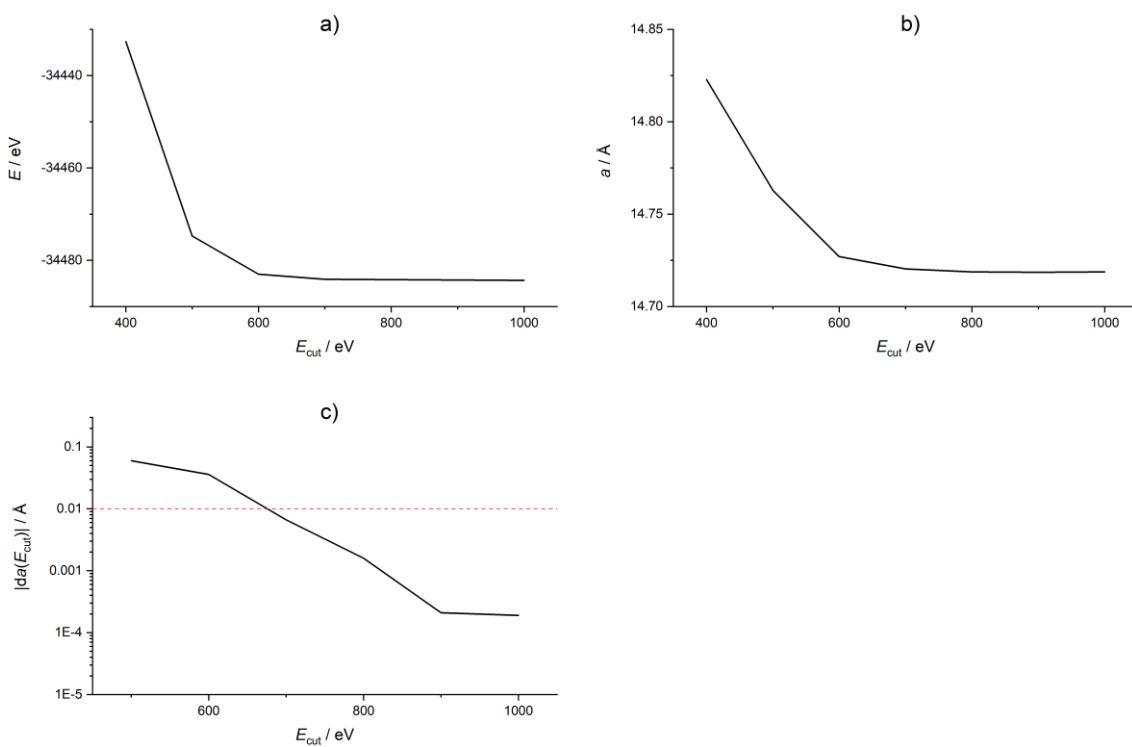

Figure S11. UiO-66-I: Convergence of a) total energy, b) lattice parameter  $a$  and c) lattice parameter  $a$  (derivation).

UiO-66-I<sub>2</sub>

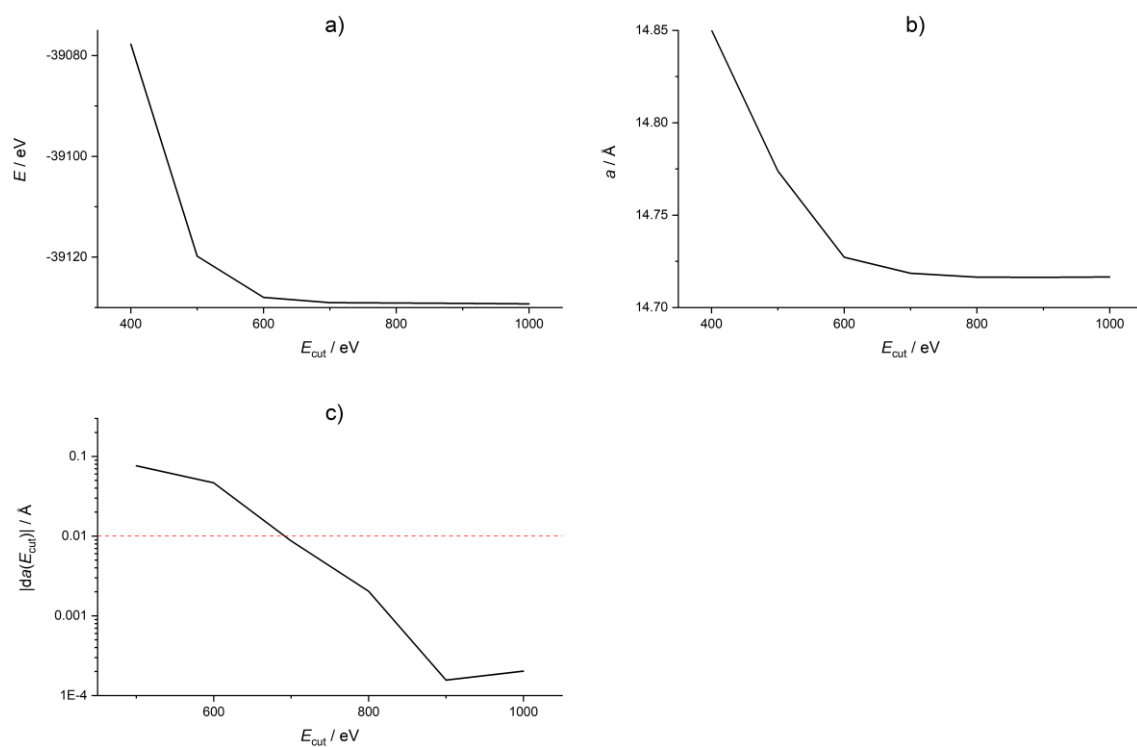

Figure S12. UiO-66-I<sub>2</sub>: Convergence of a) total energy, b) lattice parameter  $a$  and c) lattice parameter  $a$  (derivation).

### Section 3 XC functional benchmark

UiO-66

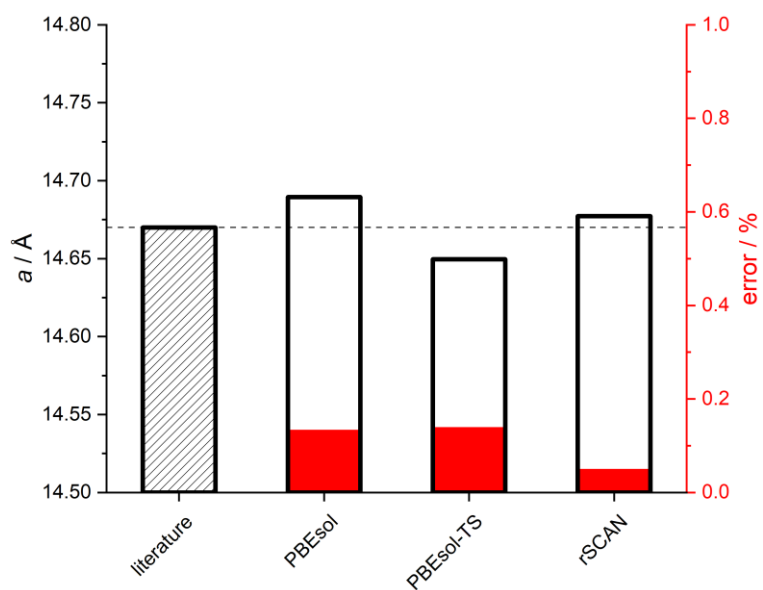

Figure S13. UiO-66: XC functional benchmark (absolute value black with relative error in red).

UiO-66-F

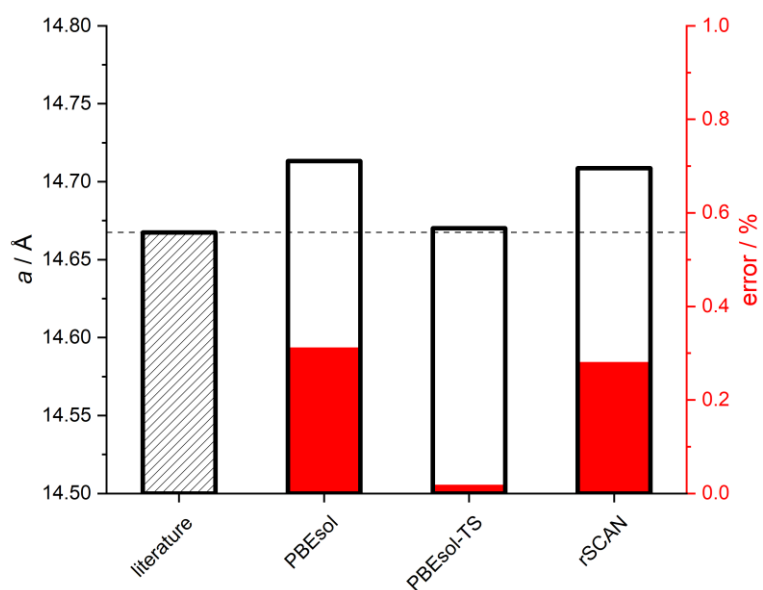

Figure S14. UiO-66-F: XC functional benchmark (absolute value black with relative error in red).

UiO-66-Cl

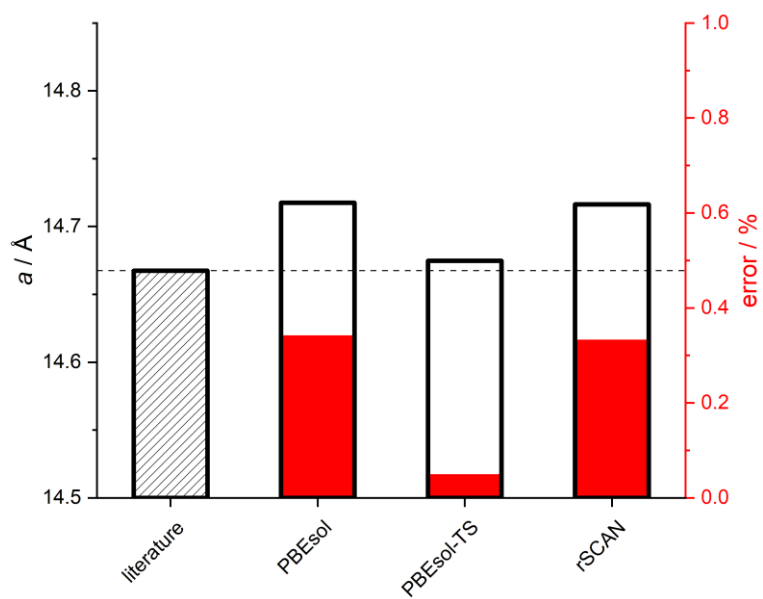

Figure S15. UiO-66-Cl: XC functional benchmark (absolute value black with relative error in red).

UiO-66-Br

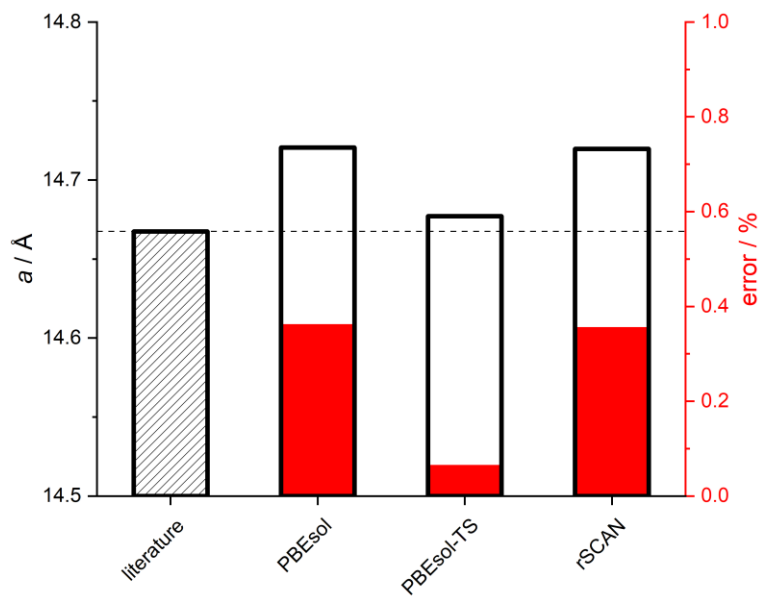

Figure S16. UiO-66-Br: XC functional benchmark (absolute value black with relative error in red).

UiO-66-I

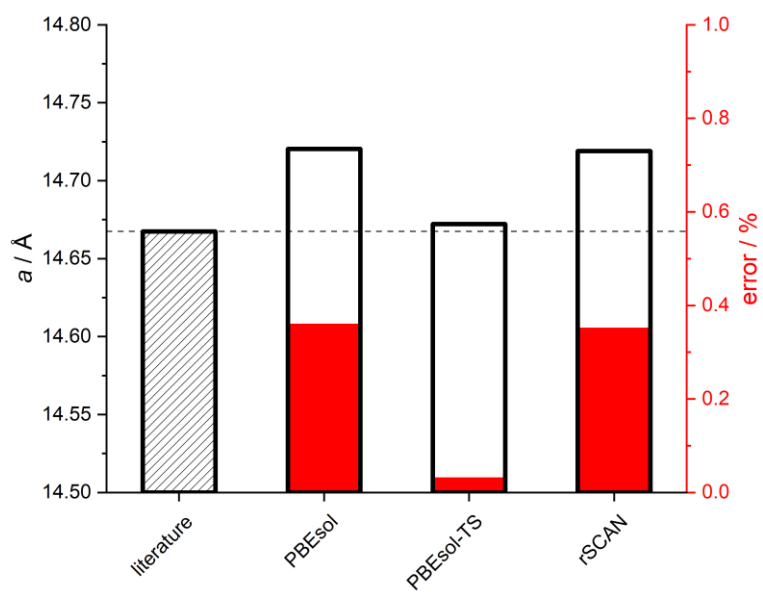

Figure S17. UiO-66-I: XC functional benchmark (absolute value black with relative error in red).

UiO-66-I<sub>2</sub>

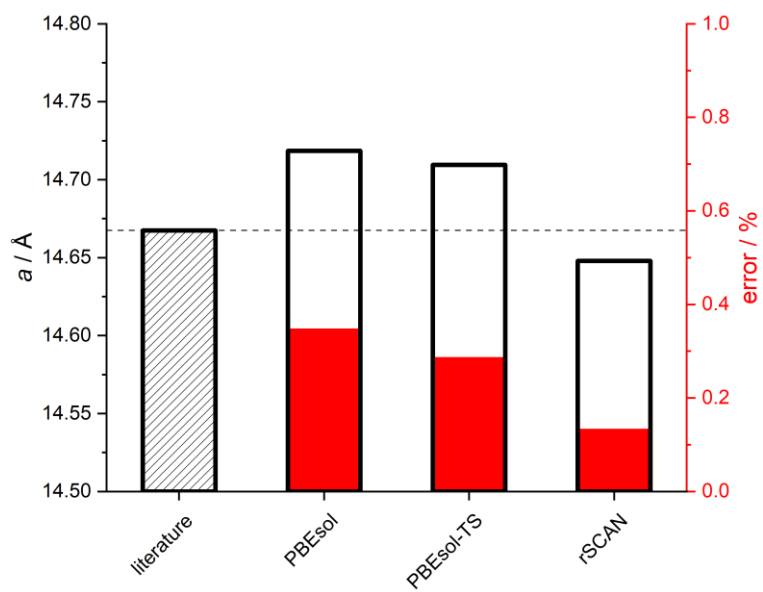

Figure S18. UiO-66-I<sub>2</sub>: XC functional benchmark (absolute value black with relative error in red).

## Section 4 Details of the DFT models

Table S1. Details of the DFT study and generated structural models of halogenated UiO-66 derivatives: space group, plane-wave kinetic energy cutoff, exchange-correlation functional, lattice parameter of the optimized primitive cell compared with the experimental UiO-66 value.

| MOF                          | Space group  | $E_{\text{cut}} / \text{eV}$ | XC functional | $a / \text{\AA}$ | Deviation / % |
|------------------------------|--------------|------------------------------|---------------|------------------|---------------|
| UiO-66 (exp.) <sup>[3]</sup> | <i>F-43m</i> |                              |               | 14.668           |               |
| UiO-66                       | <i>F-43m</i> | 1000                         | rSCAN         | 14.677           | 0.050         |
| UiO-66-F                     | <i>R3</i>    | 700                          | PBEsol-TS     | 14.670           | 0.018         |
| UiO-66-Cl                    | <i>R3</i>    | 700                          | PBEsol-TS     | 14.675           | 0.049         |
| UiO-66-Br                    | <i>R3</i>    | 700                          | PBEsol-TS     | 14.677           | 0.065         |
| UiO-66-I                     | <i>R3</i>    | 700                          | PBEsol-TS     | 14.672           | 0.032         |
| UiO-66-I <sub>2</sub>        | <i>R3</i>    | 700                          | rSCAN         | 14.648           | 0.133         |

## Section 5 Band structures

Table S2. Comparison of calculated and experimental band gaps.

| MOF                   | sim. / eV | exp. / eV |
|-----------------------|-----------|-----------|
| UiO-66                | 4.25      | 4.05      |
| UiO-66-F              | 3.96      | 4.02      |
| UiO-66-Cl             | 3.76      | 3.91      |
| UiO-66-Br             | 3.71      | 3.84      |
| UiO-66-I              | 3.16      | 3.64      |
| UiO-66-I <sub>2</sub> | 2.89      | 3.31      |

### UiO-66

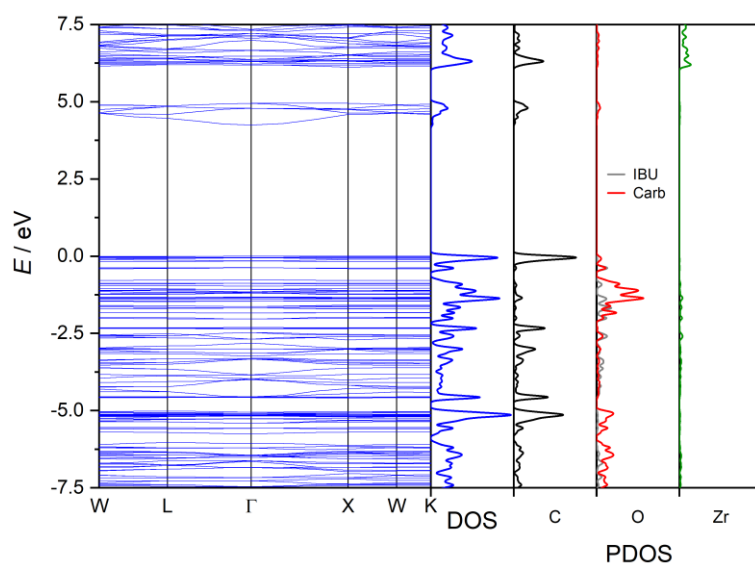

Figure S19. UiO-66 band structure with DOS and PDOS.



*UiO-66-F*

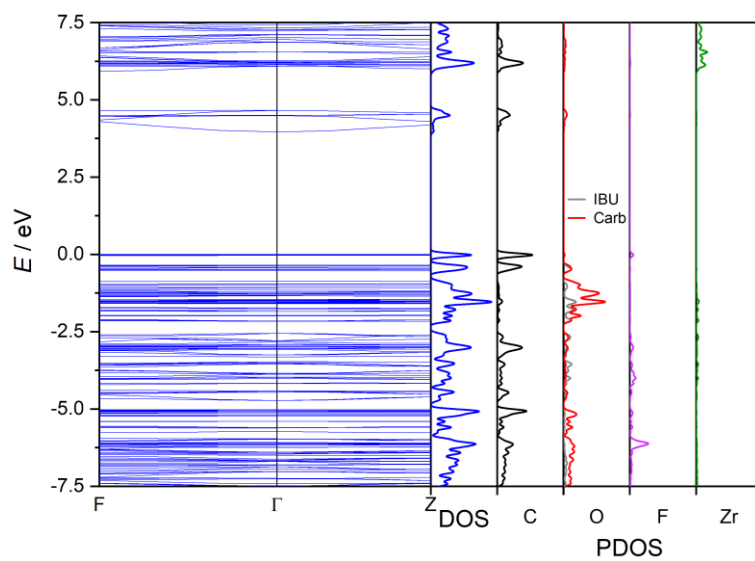

Figure S20. UiO-66-F band structure with DOS and PDOS.

*UiO-66-Cl*

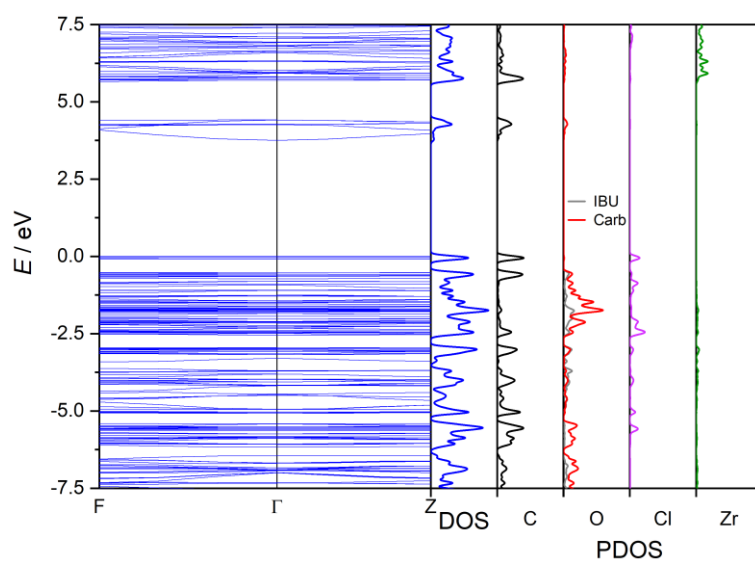

Figure S21. UiO-66-Cl band structure with DOS and PDOS.

*UiO-66-Br*

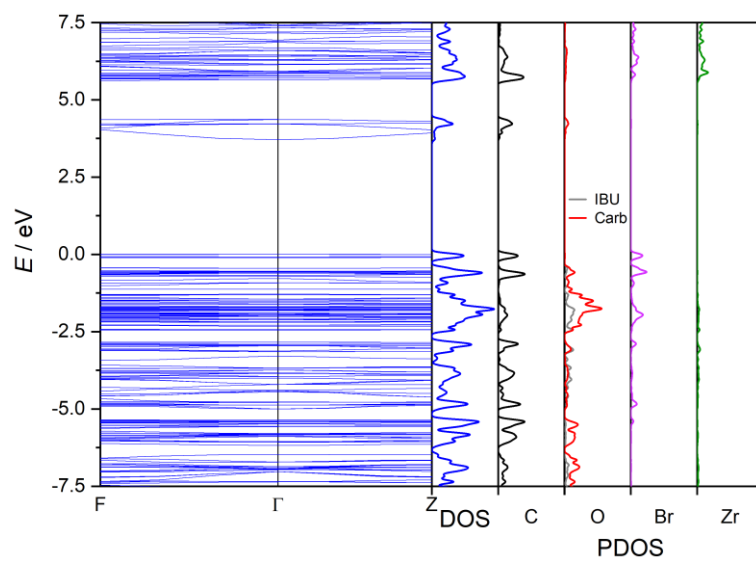

Figure S22. UiO-66-Br band structure with DOS and PDOS.

*UiO-66-I*

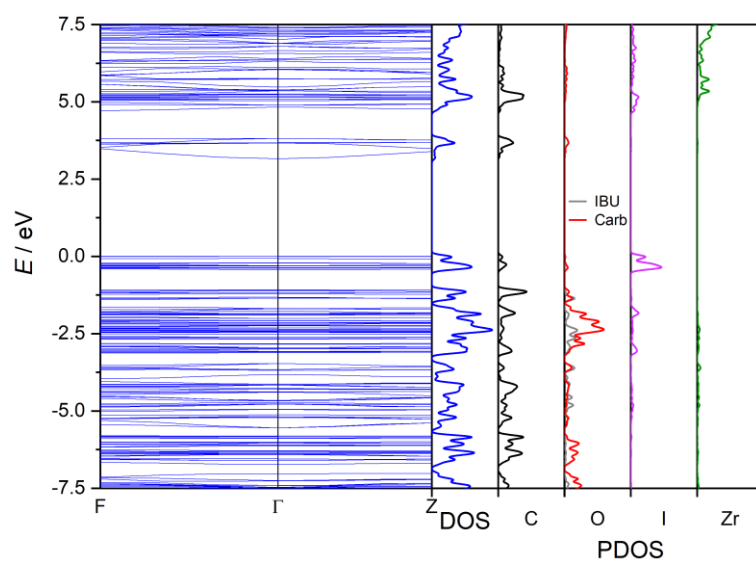

Figure S23. UiO-66-I band structure with DOS and PDOS.

UiO-66- $I_2$

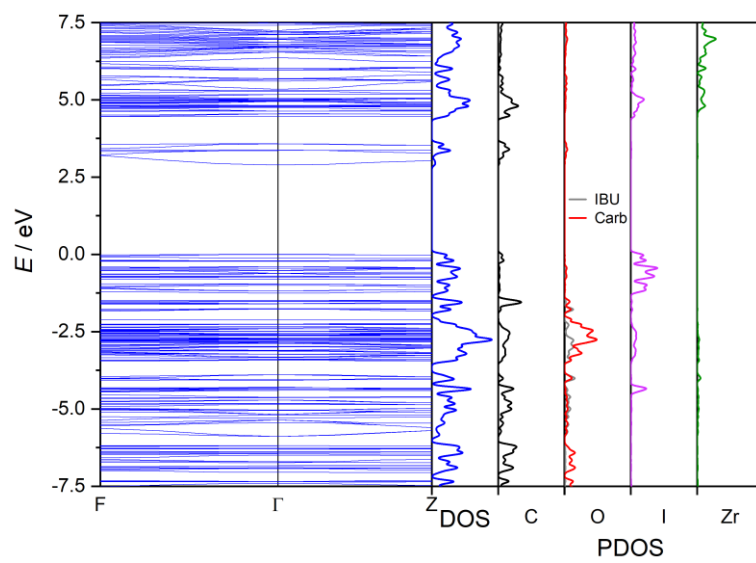

Figure S24. UiO-66- $I_2$  band structure with DOS and PDOS.

## Section 6 Refractive Index

Table S3. Comparison of calculated refractive indices at 589 nm.

| MOF                   | $n_{589}$ |
|-----------------------|-----------|
| UiO-66                | 1.373     |
| UiO-66-F              | 1.375     |
| UiO-66-Cl             | 1.416     |
| UiO-66-Br             | 1.433     |
| UiO-66-I              | 1.488     |
| UiO-66-I <sub>2</sub> | 1.585     |

## References

- [1] G. C. Shearer, S. Chavan, J. Ethiraj, J. G. Vitillo, S. Svelle, U. Olsbye, C. Lamberti, S. Bordiga, K. P. Lillerud, *Chem. Mater.* **2014**, *26*, 4068-4071.
- [2] Q. Zhou, T. M. Swager, *J. Am. Chem. Soc.* **1995**, *117*, 12593.
- [3] S. Øien, D. Wragg, H. Reinsch, S. Svelle, S. Bordiga, C. Lamberti, K. P. Lillerud, *Cryst. Growth Des.* **2014**, *14*, 5370.
